# Supplementary material for: ReClassification of Patients with Ambiguous CA125 for Optimised Pre-Surgical Triage
Source: MDPI journal article supplement (doi:10.3390/diagnostics14070671), 2024-03-22
Supplement: s1 [file s1]

**Supplementary Data S1. Diagnosis vs predicted status for all false positive / negative findings by CA125.** Predicted vs actual diagnosis and pathology information for each sample mis-diagnosed by CA125. (A) post-menopausal, and (B) pre-menopausal patients.

| <b>A. Post-menopausal patients</b> |                          |                  |                                           |              |              |                     |                  | <b>Predicted malignant (1=yes, 0=no)</b> |                                          |
|------------------------------------|--------------------------|------------------|-------------------------------------------|--------------|--------------|---------------------|------------------|------------------------------------------|------------------------------------------|
| <b>Sample Identifier</b>           | <b>menopausal status</b> | <b>Diagnosis</b> | <b>Pathology</b>                          | <b>Grade</b> | <b>Stage</b> | <b>Pre-OP CA125</b> | <b>MMP Index</b> | <b>CA125 <math>\geq 35</math>U/ml</b>    | <b>MMP Index <math>\geq 3.648</math></b> |
| 66                                 | post                     | Malignant        | serous                                    | 1            | 3C           | 8                   | 1.853            | 0                                        | 0                                        |
| 526                                | post                     | Malignant        | endometroid                               | 3            | 1A           | 9                   | 7.501            | 0                                        | 1                                        |
| 999                                | post                     | Malignant        | mucinous                                  | 1            | 1A           | 14                  | 2.091            | 0                                        | 0                                        |
| 452                                | post                     | Malignant        | serous papillary/some squamoid appearance | 3            | 3C           | 20                  | 7.007            | 0                                        | 1                                        |
| 976                                | post                     | Malignant        | serous                                    | 3            | 3C           | 21.3                | 8.775            | 0                                        | 1                                        |
| 986                                | post                     | Malignant        | serous                                    | 3            | 3C           | 23.8                | 8.784            | 0                                        | 1                                        |
| 33                                 | post                     | Malignant        | serous                                    | 2            | 3C           | 34                  | 6.091            | 0                                        | 1                                        |
| 26                                 | post                     | Benign           | cystadenoma                               | n/a          | n/a          | 35                  | 0.715            | 1                                        | 0                                        |
| EP0392                             | post                     | Benign           | simple cyst                               | n/a          | n/a          | 35                  | 0.898            | 1                                        | 0                                        |
| 140                                | post                     | Benign           | mucinous fibroma & Brenner tumour         | n/a          | n/a          | 35                  | 3.451            | 1                                        | 0                                        |
| 1082                               | post                     | Benign           | serous adenofibroma& Brenner tumour       | n/a          | n/a          | 35.1                | 1.784            | 1                                        | 0                                        |
| 620                                | post                     | Benign           | fibrothecoma                              | n/a          | n/a          | 39                  | 7.209            | 1                                        | 1                                        |
| 753                                | post                     | Benign           | cystadenoma                               | n/a          | n/a          | 43                  | 0.096            | 1                                        | 0                                        |
| 646                                | post                     | Benign           | fibroma                                   | n/a          | n/a          | 56                  | 3.158            | 1                                        | 0                                        |
| 922                                | post                     | Benign           | fibroma                                   | n/a          | n/a          | 63                  | 1.333            | 1                                        | 0                                        |
| 560                                | post                     | Benign           | fibroma                                   | n/a          | n/a          | 71                  | 0.582            | 1                                        | 0                                        |
| 98                                 | post                     | Benign           | simple cyst                               | n/a          | n/a          | 102                 | 2.155            | 1                                        | 0                                        |
| 47                                 | post                     | Benign           | cystadenoma                               | n/a          | n/a          | 146                 | 4.084            | 1                                        | 1                                        |
| 352                                | post                     | Benign           | Haemorrhagic ovarian torsion              | n/a          | n/a          | 179                 | 8.880            | 1                                        | 1                                        |
| 788                                | post                     | Benign           | fibroma                                   | n/a          | n/a          | 268                 | 1.394            | 1                                        | 0                                        |
| 775                                | post                     | Benign           | Papillary adenofibroma                    | n/a          | n/a          | 274                 | 0.897            | 1                                        | 0                                        |
| 615                                | post                     | Benign           | cystadenoma                               | n/a          | n/a          | 282.5               | 9.692            | 1                                        | 1                                        |
| 843                                | post                     | Benign           | cystadenofibroma                          | n/a          | n/a          | 345                 | 9.252            | 1                                        | 1                                        |
| 512                                | post                     | Benign           | simple cyst                               | n/a          | n/a          | 767                 | 9.102            | 1                                        | 1                                        |

| B. Pre-menopausal patients |                   |           |                       |       |       |              |           | Predicted malignant (1=yes, 0=no) |                |                |                  |
|----------------------------|-------------------|-----------|-----------------------|-------|-------|--------------|-----------|-----------------------------------|----------------|----------------|------------------|
| Sample Identifier          | menopausal status | Diagnosis | Pathology             | Grade | Stage | Pre-OP CA125 | MMP Index | CA125 ≥67U/ml                     | CA125 ≥200U/ml | CA125 ≥250U/ml | MMP Index ≥3.648 |
| 343                        | pre               | Benign    | fibroma               | n/a   | n/a   | 1841         | 0.128     | 1                                 | 1              | 1              | 0                |
| 845                        | pre               | Malignant | mucinous              | 2     | 1A    | 15           | 0.173     | 0                                 | 0              | 0              | 0                |
| 388                        | pre               | Malignant | Granulosa cell tumour | 2     | 1A    | 10           | 0.244     | 0                                 | 0              | 0              | 0                |
| 287                        | pre               | Benign    | Xanthogranulomatous   | n/a   | n/a   | 538          | 0.377     | 1                                 | 1              | 1              | 0                |
| 1016                       | pre               | Malignant | serous                | 3     | 3B    | 25           | 0.755     | 0                                 | 0              | 0              | 0                |
| 450                        | pre               | Malignant | serous                | 2     | 3B    | 130          | 1.545     | 1                                 | 0              | 0              | 0                |
| 847                        | pre               | Benign    | Lipoid cell tumour    | n/a   | n/a   | 245          | 3.249     | 1                                 | 1              | 0              | 0                |
| 301                        | pre               | Malignant | serous / clear cell   | 3     | 3C    | 58           | 3.684     | 0                                 | 0              | 0              | 1                |
| 649                        | pre               | Malignant | dysgerminoma          | 2     | 1B    | 80           | 4.583     | 1                                 | 0              | 0              | 1                |
| 56                         | pre               | Malignant | mucinous              | 1     | 1C    | 62           | 5.324     | 0                                 | 0              | 0              | 1                |
| 30                         | pre               | Benign    | cystadenomata         | n/a   | n/a   | 546          | 5.569     | 1                                 | 1              | 1              | 1                |
| 136                        | pre               | Malignant | clear cell            | 3     | 1C    | 132          | 7.825     | 1                                 | 0              | 0              | 1                |
| 336                        | pre               | Malignant | serous                | 2     | 3C    | 120          | 9.393     | 1                                 | 0              | 0              | 1                |
| 147                        | pre               | Malignant | serous                | 3     | 3C    | 40           | 9.537     | 0                                 | 0              | 0              | 1                |
| 317                        | pre               | Malignant | serous                | 3     | 3C    | 80           | 9.967     | 1                                 | 0              | 0              | 1                |
